# Supplementary material
Source: bioRxiv or medRxiv preprint supplement (https://www.biorxiv.org/highwire/filestream/123907/field_highwire_adjunct_files/0/409557-1.pdf)
Supplement: Supplementary file [file 409557-1.pdf]

Electronic supplementary material

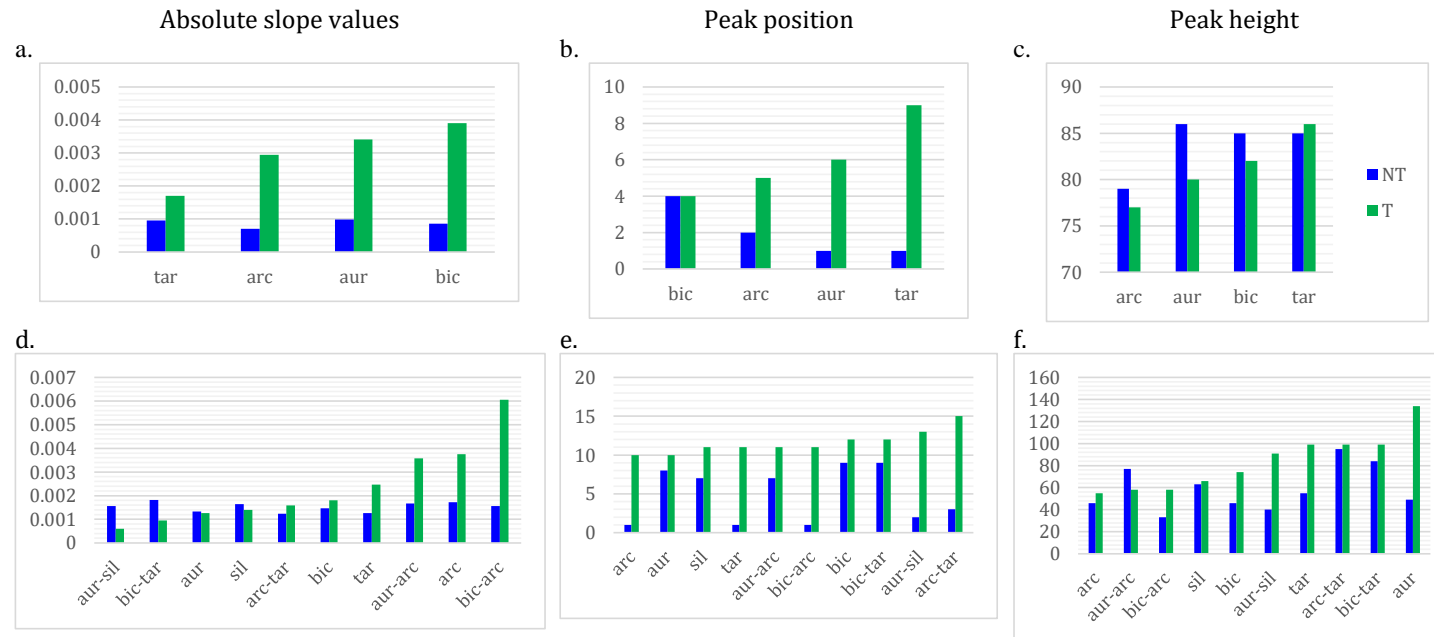

Figure S1. Absolute slope values (a and d), peak position (b and e) and peak height (c and f) for simple (top row) and complex communities (bottom row). Green bars are for toxic (T) forms while blue bars are for non-toxic (NT) morphs. Morphs were order in accordance to slope, position and peak height magnitude when defended.

Table S1. Linear mixed model (LMM) results for attack between each stamped palatable butterfly and the most similar defended morph while learning on the simple community and for perceptual PCA. The best fitting model includes score and sporting yellow or not.

|                 | Estimate | Std. Error | <i>t</i> |
|-----------------|----------|------------|----------|
| Intercept       | 2.217    | 0.206      | 10.737   |
| Score           | 0.016    | 0.004      | 3.606    |
| Yellow in morph | -0.580   | 0.204      | -2.837   |

Table S2. Linear mixed model (LMM) results for attack between each stamped palatable butterfly and the most similar defended morph while learning on the simple community and for binary PCA. The best fitting model includes **score** and presence of yellow in morph as explanatory variables.

|                 | Estimate | Std. Error | <i>t</i> |
|-----------------|----------|------------|----------|
| Intercept       | 2.760    | 0.132      | 20.825   |
| Yellow in morph | -0.709   | 0.210      | -3.369   |

Commenté [MA1]: Why score is not part of best model??

Table S3. Linear mixed model (LMM) results for attack rate on defended morphs while learning on the simple community and for binary and perceptual PCA. No effect of explanatory variables was found

|           | Estimate | Std. Error | <i>t</i> |
|-----------|----------|------------|----------|
| Intercept | 0.176    | 0.005      | 33.95    |

Table S4. Linear mixed model (LMM) results for attack between each stamped palatable butterfly and the most similar defended morph while learning on the complex community and for perceptual PCA. The best fitting model only includes score as explanatory variable.

|           | Estimate | Std. Error | <i>t</i> |
|-----------|----------|------------|----------|
| Intercept | 0.81     | 0.042      | 19.09    |
| Score     | 0.004    | 0.001      | 4.49     |

Table S5. Linear mixed model (LMM) results for attack between each stamped palatable butterfly and the most similar defended morph while learning on the complex community and for binary PCA. The best fitting model includes score and distance to closest defended form as explanatory variables.

|                    | Estimate  | Std. Error | <i>t</i> |
|--------------------|-----------|------------|----------|
| Intercept          | 0.2321473 | 0.1554883  | 1.493    |
| Dist.closestToxnQC | 0.0022769 | 0.0005952  | 3.826    |
| Score              | 0.0041217 | 0.0009186  | 4.487    |

Table S6. Linear mixed model (LMM) results for attack rate on defended morphs while learning on the complex community and for binary and perceptual PCA. No effect of explanatory variables was found

|           | Estimate | Std. Error | <i>t</i> |
|-----------|----------|------------|----------|
| Intercept | 0.131    | 0.003      | 41.59    |

Table S7. Linear mixed model (LMM) results for attack between each stamped palatable butterfly and the most similar defended morph after learning on the simple community and for perceptual PCA. The best fitting model includes score and ID of closest defended form (CT) as explanatory variables.

|                | Estimate | Std. Error | <i>t</i> |
|----------------|----------|------------|----------|
| Intercept      | 2.320    | 1.783      | 1.301    |
| Score          | 0.059    | 0.020      | 2.967    |
| CT arc<aur&bic | 0.448    | 0.428      | 1.048    |
| CT aur>bic     | -0.431   | 1.042      | -0.414   |

Table S8. Linear mixed model (LMM) results for attack between each stamped palatable butterfly and the most similar defended morph after learning on the simple community and for binary PCA. The best fitting model includes score and ID of closest defended form (CT) as explanatory variables.

|                | Estimate | Std. Error | <i>t</i> |
|----------------|----------|------------|----------|
| Intercept      | 0.523    | 1.646      | 0.318    |
| Score          | 0.073    | 0.018      | 4.058    |
| CT arc<aur&bic | 0.366    | 0.386      | 0.95     |
| CT aur>bic     | -0.883   | 0.874      | -1.011   |

Table S9. Linear mixed model (LMM) results for attack rate on defended morphs after learning on the simple community and for both perceptual and binary PCA.

|           | Estimate   | Std. Error | <i>t</i> |
|-----------|------------|------------|----------|
| Intercept | 0.4527257  | 0.0304706  | 14.858   |
| Score     | -0.0031805 | 0.0003562  | -8.929   |

Table S10. Linear mixed model (LMM) results for attack between each stamped palatable butterfly and the most similar defended morph after learning on the complex community and for perceptual PCA. The best fitting model only includes score as explanatory variable.

|           | Estimate  | Std. Error | <i>t</i> |
|-----------|-----------|------------|----------|
| Intercept | -0.472734 | 0.173746   | -2.721   |
| Score     | 0.029279  | 0.002645   | 11.071   |

Table S11. Linear mixed model (LMM) results for attack between each stamped palatable butterfly and the most similar defended morph after learning on the complex community and for binary PCA. The best fitting model only includes score as explanatory variable.

|           | Estimate | Std. Error | <i>t</i> |
|-----------|----------|------------|----------|
| Intercept | -0.392   | 0.152      | -2.573   |
| Score     | 0.0275   | 0.002      | 11.991   |

Table S12. Linear mixed model (LMM) results for attack rate on defended morphs after learning on the complex community and for both perceptual and binary PCA. The best fitting model only includes score as explanatory variable

|           | Estimate  | Std. Error | <i>t</i> |
|-----------|-----------|------------|----------|
| Intercept | 0.409969  | 0.033269   | 12.323   |
| Score     | -0.003556 | 0.000552   | -6.442   |
